# Supplementary material for: Rehabilitative exercise and spatially patterned nanofibrillar scaffolds enhance vascularization and innervation following volumetric muscle loss
Source: PubMed Central journal article supplement (PMC6141593; doi:10.1038/s41536-018-0054-3), 2018-09-17
Supplement: 41536_2018_54_MOESM1_ESM.pdf [file 41536_2018_54_MOESM1_ESM.pdf]

## Supplementary Information

### Rehabilitative Exercise and Spatially Patterned Nanofibrillar Scaffolds Enhance Vascularization and Innervation Following Volumetric Muscle Loss

Karina H. Nakayama<sup>1,2,3</sup>, Cynthia Alcazar<sup>1</sup>, Guang Yang,<sup>1,2</sup>  
Marco Quarta<sup>1,4</sup>, Patrick Paine<sup>1</sup>, Linda Doan<sup>1</sup>, Adam  
Davies<sup>1</sup>, Thomas A. Rando<sup>1,4</sup>, Ngan F. Huang<sup>1,2,3\*</sup>

#### **Affiliations:**

<sup>1</sup> Veterans Affairs Palo Alto Health Care System, 3801 Miranda Avenue, Palo Alto, CA, 94304

<sup>2</sup> The Stanford Cardiovascular Institute, Stanford University, Stanford, CA, 94305

<sup>3</sup> Department of Cardiothoracic Surgery, Stanford University, Stanford, CA, 94305

<sup>4</sup> Department of Neurology and Neurological Sciences, Stanford University, Stanford, CA, 94304

\*To whom correspondence should be addressed:

Dr. Ngan F. Huang, PhD

Email: ngantina@stanford.edu

Randomly-Oriented Scaffolds

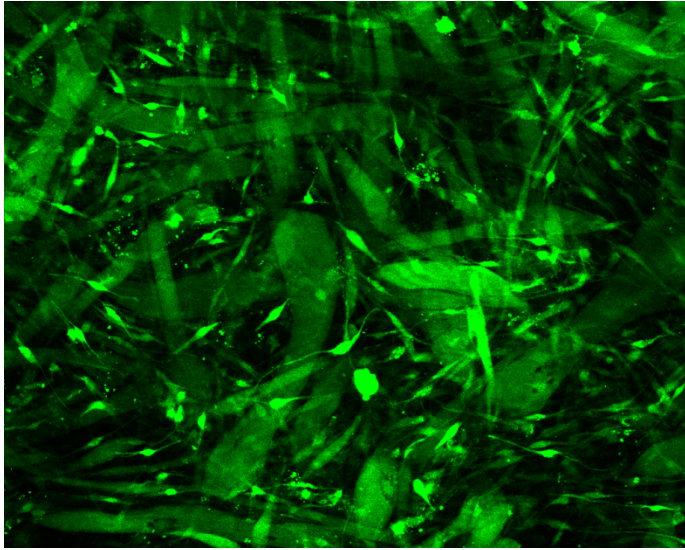

Aligned Nanofibrillar Scaffolds

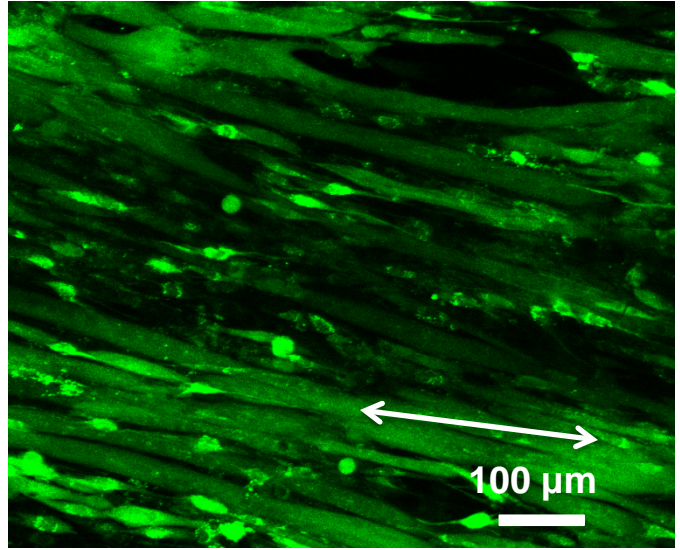

**Supp Fig 1. Green fluorescence protein-expressing mouse myotubes formed on randomly oriented or aligned scaffolds after 5 days of differentiation.** Double arrows depict orientation of aligned nanofibrils.

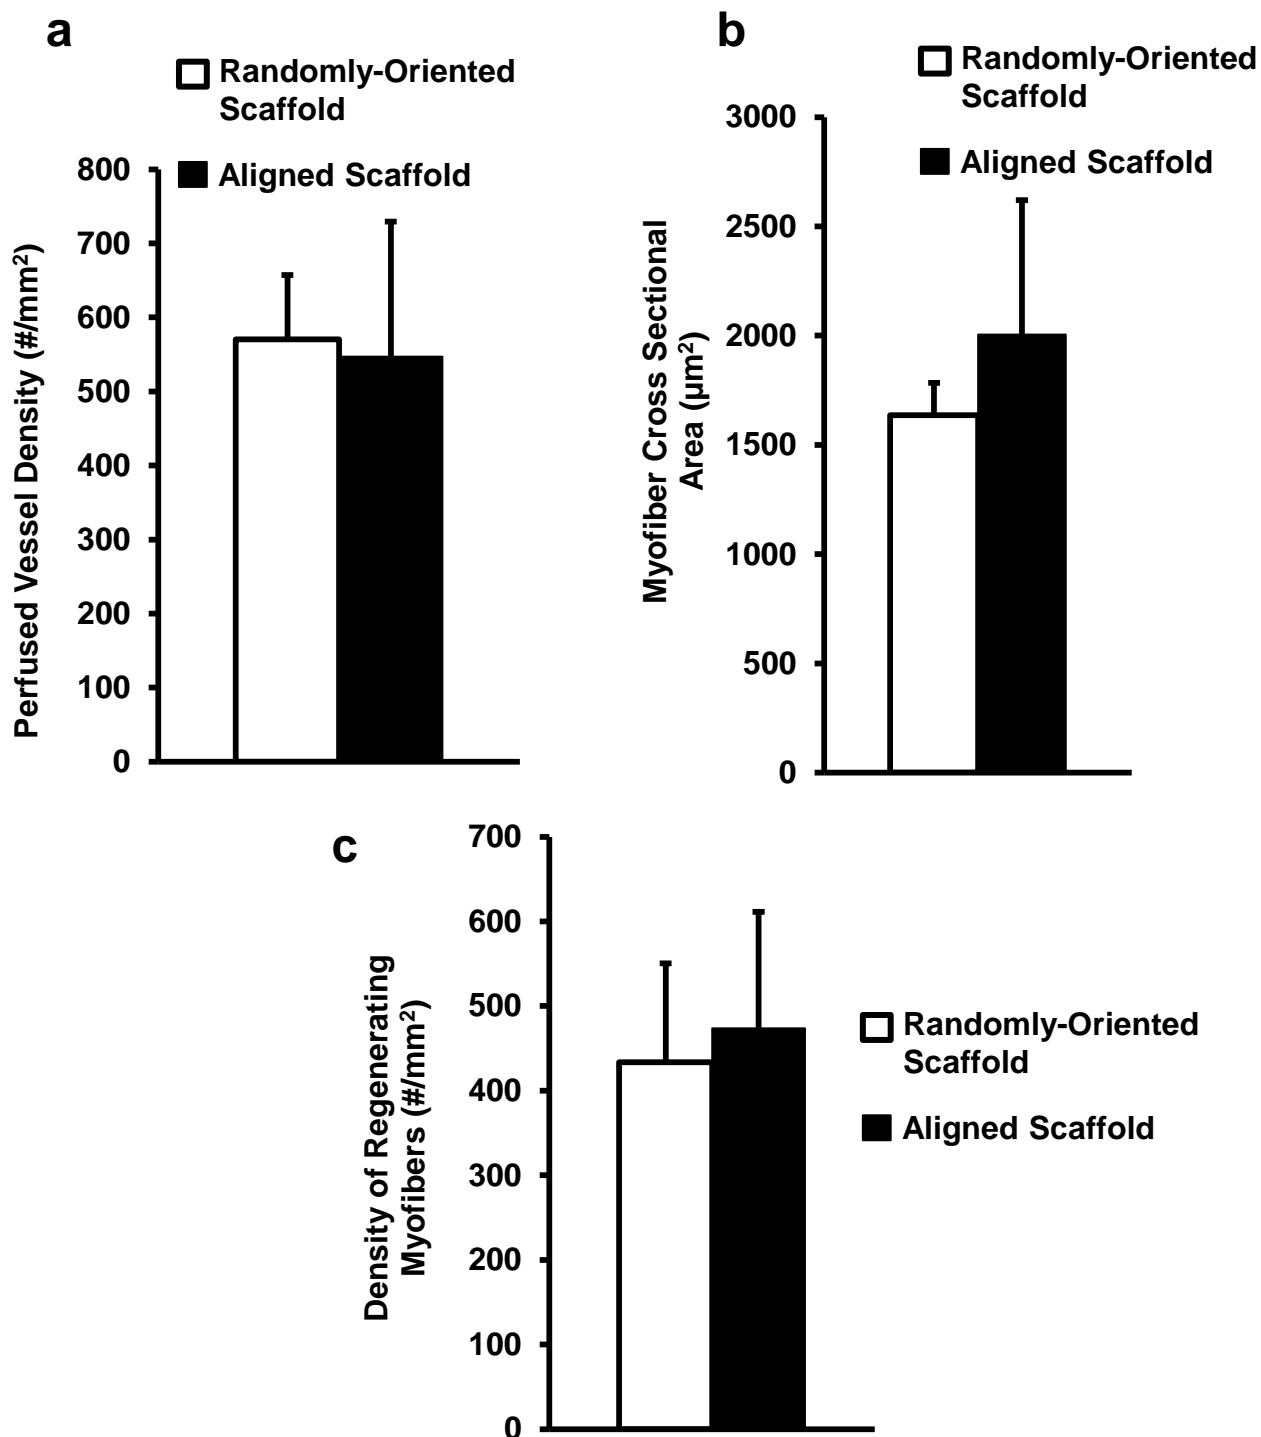

**Supp. Fig. 2. Muscle regeneration and revascularization after implantation of aligned or randomly oriented scaffold aggregates in a mouse model of VML. A-C.** Randomly oriented or aligned scaffolds were implanted into the void space of the ablated tibialis anterior muscle. After 3 weeks of implantation in the absence of exercise, immunofluorescence analysis was performed on the tibialis anterior muscle for antibodies against CD31, myosin heavy chain (MHC), and laminin. Within a 500μm distance from the edge of the scaffold, quantification of perfused (CD31<sup>+</sup>/isolectin<sup>+</sup>) vessel density (A), MHC<sup>+</sup> myofiber cross sectional area (B), and *de novo* myogenesis (# MHC<sup>+</sup> myofibers /mm<sup>2</sup>) (C) were performed. Shown are mean ± SD (randomly oriented scaffold (n=4), aligned scaffold (n=6)). Error bars denote standard deviation.

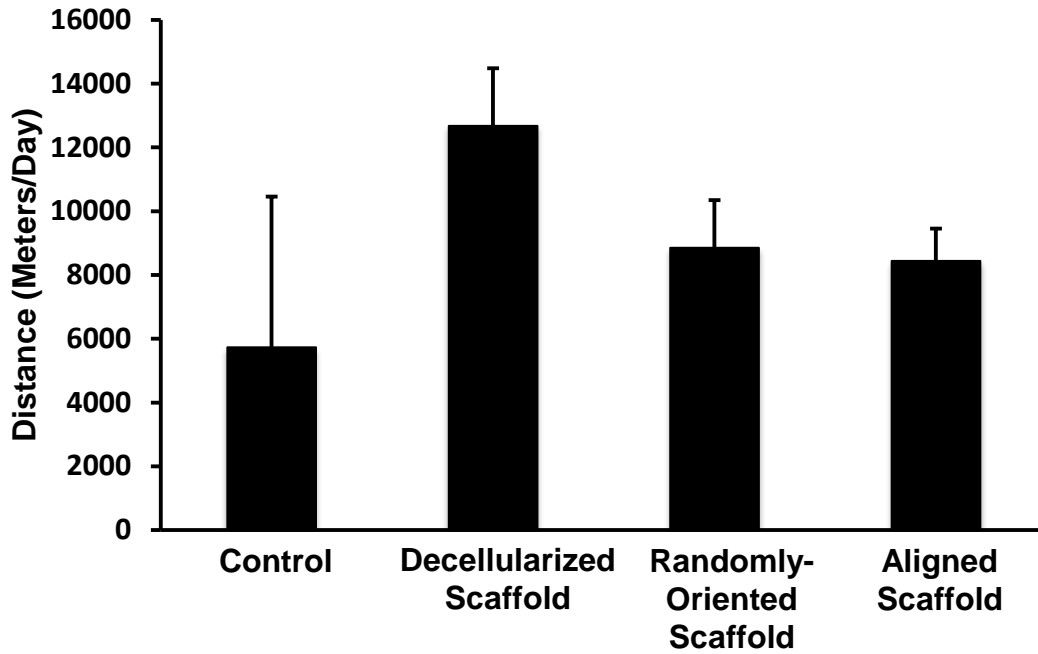

**Suppl. Fig. 3. Caged Wheel running distance (meters).** 7 days after initial transplants, mice were introduced to exercise wheels and running distance was tracked per day. Graph shows the averaged running distance per day for each treatment group (n=3 each group). Error bars denote standard deviation.

## No Exercise

## With Exercise

Randomly-  
Oriented Scaffold

Aligned  
Scaffold

Randomly-  
Oriented Scaffold

Aligned  
Scaffold

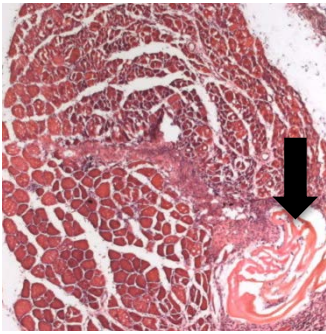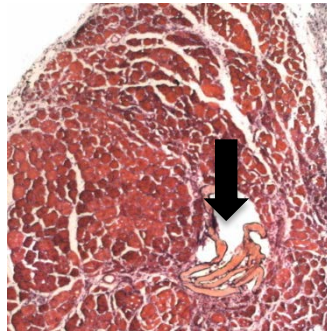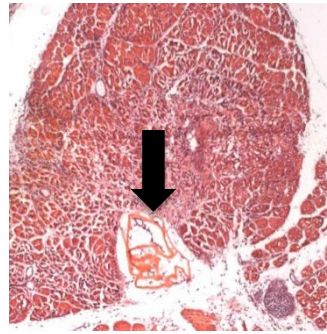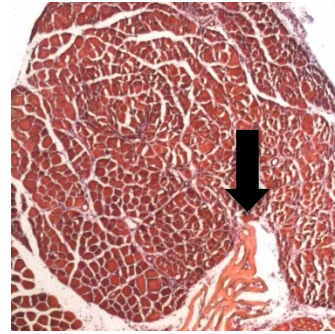

Control

Decellularized  
Scaffold

Control

Decellularized  
Scaffold

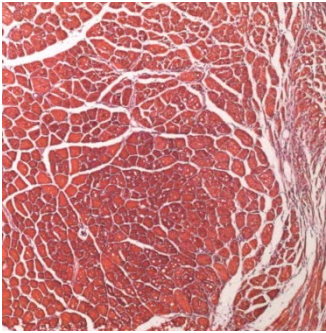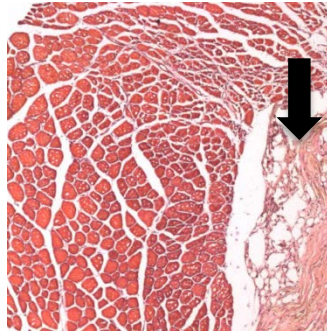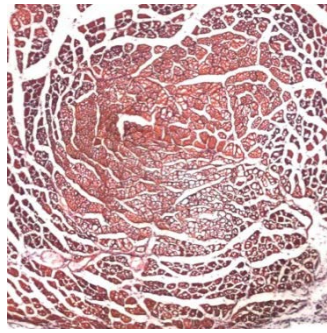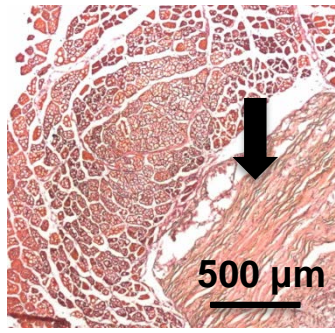

**Suppl. Fig. 4. Histological assessment of tissue cross sections by hematoxylin and eosin stains.** At 3 weeks after implantation into the ablated tibialis anterior muscle, the scaffold-containing muscle was excised. H&E staining was used to visualize the remnants of the scaffold (denoted by arrow). Scale bar: 500  $\mu\text{m}$ .

## Myofiber Area Frequency (No Exercise)

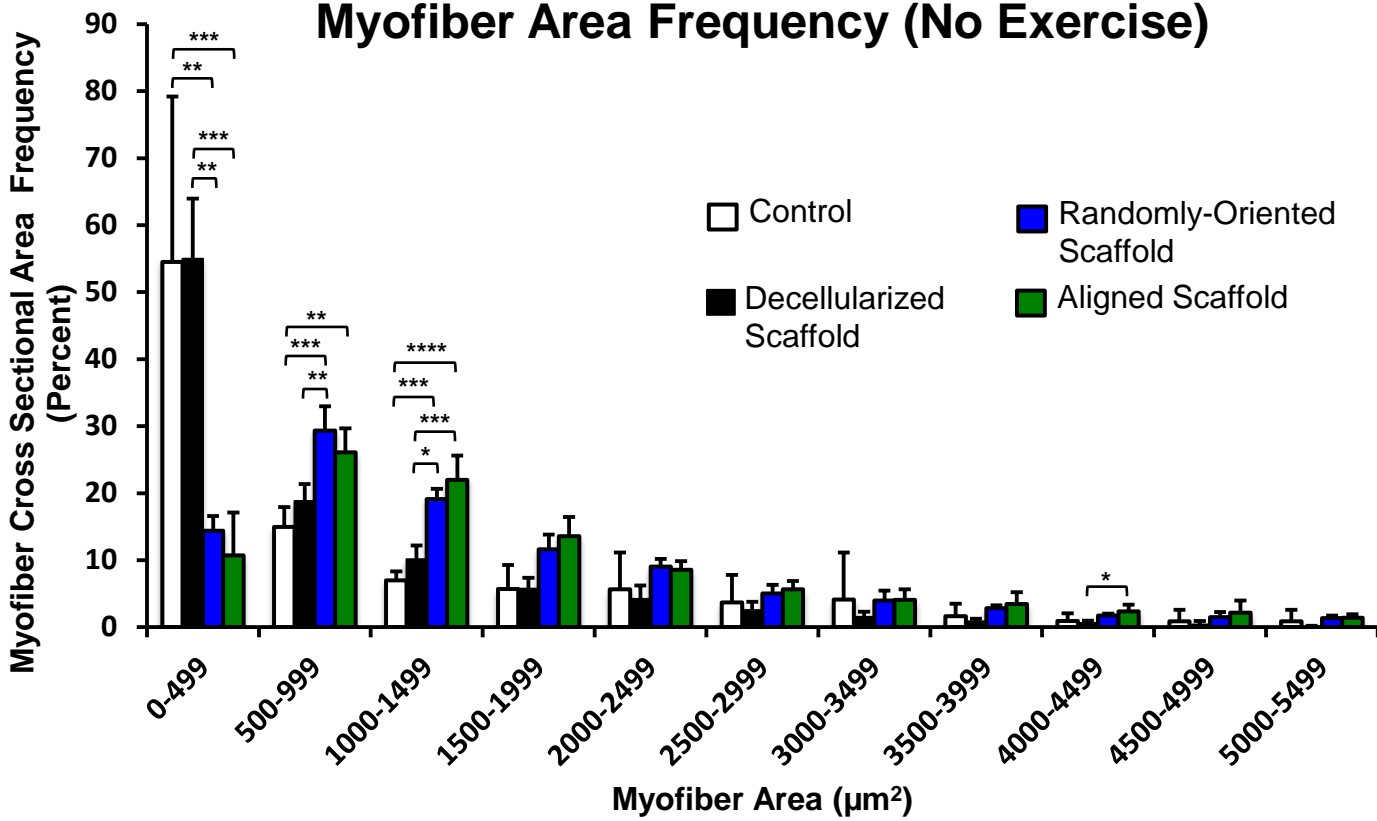

## Myofiber Area Frequency (Exercise)

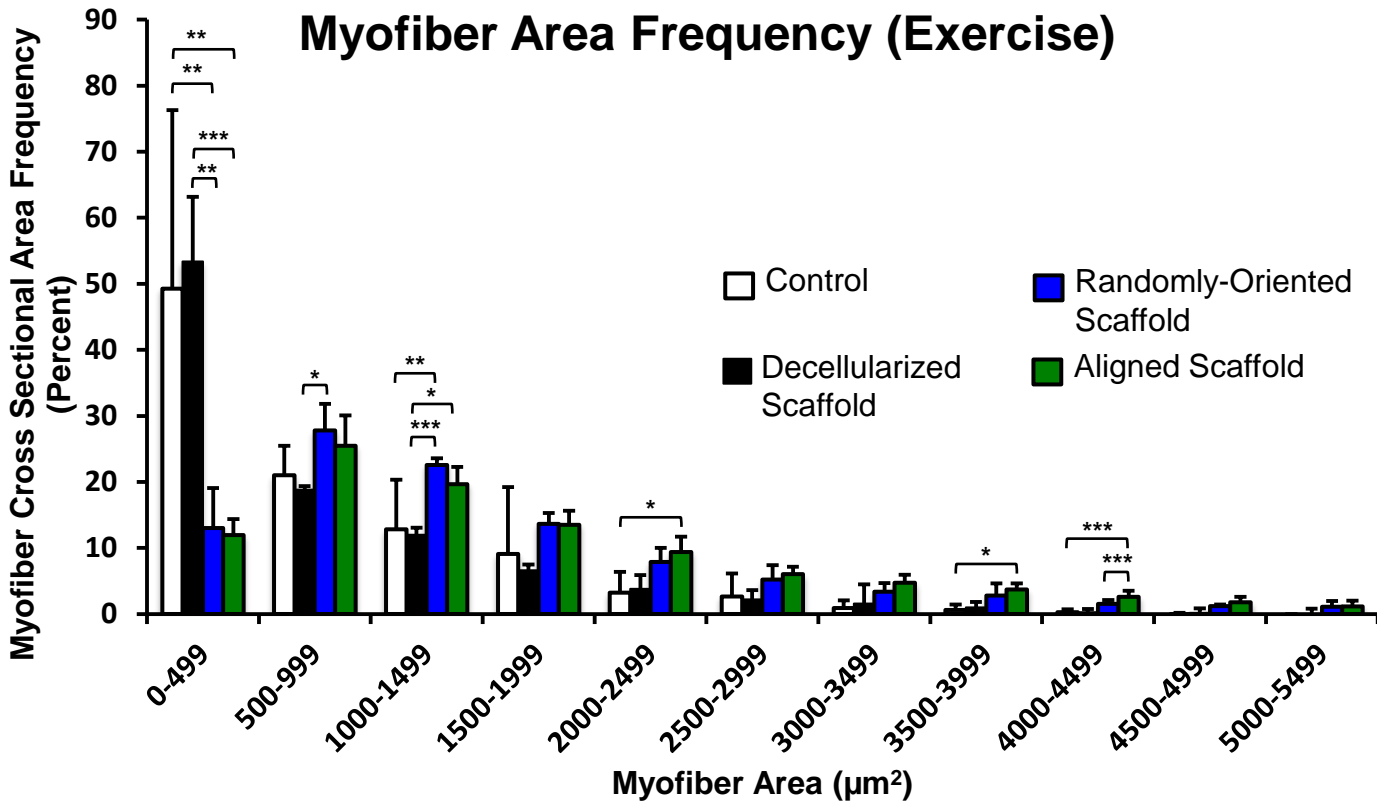

**Suppl. Fig. 5. Histological assessment of regenerating myofiber cross-sectional area.** Frequency distribution of mean myofiber area sizes in the presence or absence of exercise. Shown are mean  $\pm$  SD (aligned scaffold with or without exercise (n=6), randomly oriented scaffold with exercise (n=5), and all other groups (n=4)). Statistically significant comparisons: \*P<0.05, \*\*P<0.01, \*\*\*P<0.001, \*\*\*\*P<0.0001. Error bars denote standard deviation.

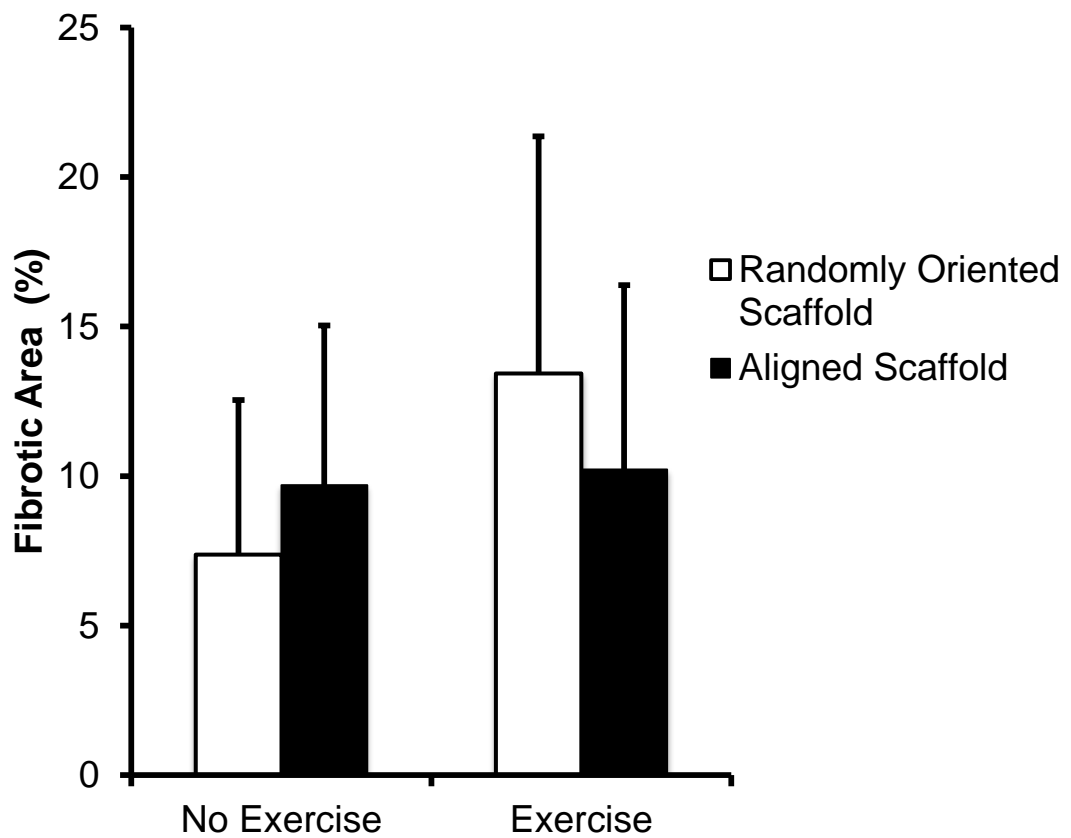

**Suppl Fig. 6. Quantification of fibrosis in the injured muscle by the percent area of collagen from Trichrome-stained slides (n=4). Error bars denote standard deviation.**
